# Supplementary material
Source: HighWire-hosted journal article supplement (https://erj.ersjournals.com/content/56/3/2002113)
Supplement: inline-supplementary-material-1 [file inline-supplementary-material-1.pdf]

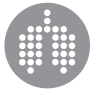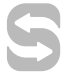

SHAREABLE PDF

AGORA

RESEARCH LETTER

ERJ European Respiratory Journal Eur Respir J 0903-1936/1399-3003 European Respiratory Society 10.1183/13993003.02113-2020 ERJ-02113-2020 AGORA RESEARCH LETTER

Comparison of severity scores for COVID-19 patients with pneumonia: a retrospective study G. FAN ET AL. RESEARCH LETTER Comparison of severity scores for COVID-19 patients with pneumonia

FanGuohui<sup>1,2,7</sup>, TuChao<sup>3,7</sup>, ZhouFei<sup>2,4,7</sup>, LiuZhibo<sup>2,4,7</sup>, WangYeming<sup>2,4,5,7</sup>, SongBin<sup>3</sup>, GuXiaoying<sup>1,2</sup>, WangYimin<sup>2,4</sup>, WeiYuan<sup>3</sup>, LiHui<sup>2,4</sup>, WuXudong<sup>3</sup>, XuJiuyang<sup>6</sup>, TuShengjin<sup>3</sup>, ZhangYi<sup>2,4</sup>, WuWenjuan<sup>3,8</sup>, CaoBin<sup>2,4,5,8</sup>,

1Institute of Clinical Medical Sciences, China-Japan Friendship Hospital, Beijing, China. 2Institute of Respiratory Medicine, Chinese Academy of Medical Sciences, National Clinical Research Center for Respiratory Disease, National Center for Respiratory Disease, Beijing, China. 3Jin Yin-tan Hospital, Wuhan, China. 4Dept of Pulmonary and Critical Care Medicine, Center of Respiratory Medicine, China-Japan Friendship Hospital, Beijing, China. 5Dept of Respiratory Medicine, Capital Medical University, Beijing, China. 6Tsinghua University School of Medicine, Beijing, China. 7Contributed equally to this work. 8Wenjuan Wu and Bin Cao contributed equally to this article as lead authors and supervised the work.

**Correspondence:** Bin Cao, Dept of Pulmonary and Critical Care Medicine, China-Japan Friendship Hospital, Institute of Respiratory Medicine, Chinese Academy of Medical Sciences; National Clinical Research Center for Respiratory Disease, Clinical Center for Pulmonary Infections, Capital Medical University; Tsinghua University-Peking University Joint Center for Life Sciences, No 2, East Yinghua Road, Chaoyang District, Beijing, China. 100029. E-mail: caobin\_ben@163.com 2020202056014042020290620202020

#### To the Editor:

Rapidly progressing hypoxemia and acute respiratory distress syndrome were commonly observed in patients with severe acute respiratory syndrome-coronavirus-2 (SARS-CoV-2) viral pneumonia [1]. Although several severity scores including Pneumonia Severity Index (PSI) [2], CURB-65 and CRB-65 (confusion, (urea >7 mmol·L<sup>-1</sup>), respiratory rate ≥30 breaths·min<sup>-1</sup>, blood pressure <90 mmHg (systolic) ≤60 mmHg (diastolic), age ≥65 years), [3], A-DROP [4] and SMART-COP [5] have been developed to identify community acquired pneumonia (CAP) patients at high risk and offer therapeutic advice, the underestimation of risk of death from viral pneumonia in these scores has been reported by previous studies [6, 7]. The National Early Warning Score 2 (NEWS2) was developed by National Health Service (NHS) England [8] and, along with quick sequential organ failure assessment score (qSOFA), was proposed as a candidate for prognostic prediction for severe coronavirus disease 2019 (COVID-19) in the situation of limited medical source [9]. The aim of this study was to compare the accuracy of current score rules in hospitalised patients with COVID-19 pneumonia for predicting the risk of death and evaluate feasibility in improving medical decisions by adopting appropriate scores in clinical practice.
